1

2

## **1Single-cell transcriptomics reveals temporal dynamics of critical regulators of germ 2cell fate during mouse sex determination**

**3Authors:** Chloé Mayère<sup>1,2</sup>, Yasmine Neirijnck<sup>1</sup>, Pauline Sararols<sup>1</sup>, Isabelle Stévant<sup>1,2</sup>,  
4Françoise Kühne<sup>1</sup>, Anne Amandine Chassot<sup>3</sup>, Marie-Christine Chaboissier<sup>3</sup>, Emmanouil  
5T. Dermitzakis<sup>1,2</sup>, Serge Nef<sup>1,2,\*</sup>.

### **6Affiliations:**

7<sup>1</sup>Department of Genetic Medicine and Development, University of Geneva, 1211 Geneva,  
8Switzerland;

9<sup>2</sup>iGE3, Institute of Genetics and Genomics of Geneva, University of Geneva, 1211  
10Geneva, Switzerland;

11<sup>3</sup>Université Côte d'Azur, CNRS, Inserm, iBV, France;

### **12Lead Contact:**

13\*Corresponding Author: [Serge.Nef@unige.ch](mailto:Serge.Nef@unige.ch)

14

4

5

## 15Summary

16Despite the importance of germ cell differentiation for sexual reproduction, gene  
17networks underlying their fate remain unclear. Here, we describe a comprehensive  
18characterization of gene expression dynamics during sex determination based on  
19single-cell RNA sequencing on 14,750 XX and XY mouse germ cells between  
20embryonic days 10.5 and 16.5. By computational gene regulation inference analysis,  
21we identified sex-specific, sequential waves of master regulator genes during germ  
22cells differentiation and unveiled that the meiotic initiator *Stra8* is regulated by  
23positive and negative master regulators acting in an antagonistic fashion. Consistent  
24with the importance of the somatic environment, we found that rare adrenal germ  
25cells exhibit delayed meiosis and display altered expression of master genes  
26controlling the female and male genetic programs. Our study provides a molecular  
27roadmap of germ cell sex determination at single-cell resolution that will serve as a  
28valuable resource for future studies of gonad development, function and disease.

29

30

## 31Keywords:

32Single-cell RNA-Sequencing (scRNA-seq), sex determination, ovary, testis, gonocytes,  
33oocytes, prospermatogonia, meiosis, gene regulatory network, regulon

### 34Introduction

35In mice, primordial germ cells (PGCs) arise in the posterior proximal epiblast around  
36embryonic day (E) 6.25. PGCs rapidly proliferate and colonize the gonads at around  
37E10.5 (Saitou and Yamaji, 2012; Tam and Snow, 1981). The germ cell fate depends on  
38sex-specific somatic cues provided by the ovarian and testicular environments rather than  
39the chromosomal sex of the germ cells themselves (Byskov and Saxen, 1976; Evans et  
40al., 1977; McLaren, 1983).

41In fetal ovaries, germ cells enter meiosis asynchronously in a wave from anterior to  
42posterior over about 2 days, between E12.5 and E14.5 (Bullejos and Koopman, 2004;  
43Menke et al., 2003; Yao et al., 2003). This entry into meiosis is considered a hallmark of  
44commitment to oogenesis. It is triggered by the expression of the pre-meiotic marker  
45*Stra8* and the meiosis-associated gene *Rec8* and, at the same time, by the downregulation  
46of pluripotency markers such as *Oct4 (Pou5f1)*, *Sox2* and *Nanog* (Baltus et al., 2006;  
47Bowles et al., 2006; Bullejos and Koopman, 2004; Koubova et al., 2014; Koubova et al.,  
482006; Menke et al., 2003; Yao et al., 2003).

49In contrast, germ cells in fetal testes differentiate into prospermatogonia through a  
50number of distinct, potentially interrelated events that occur asynchronously over a period  
51of several days, but this does not involve entry into meiosis (for a review see (Kocer et  
52al., 2009) and (Spiller and Bowles, 2019) ). Germ cells adopting the male fate up-regulate  
53cell-cycle inhibitors such as *Cdkn2b* (Western et al., 2008) and are mitotically arrested  
54from E12.5 onward (McLaren, 1984). They transiently activate the NODAL/CRIPTO  
55signaling pathway (Souquet et al., 2012; Spiller et al., 2012a; Spiller et al., 2012b) and  
56down-regulate pluripotency genes such as *Nanog*, *Sox2* and *Pou5f1* (Western et al.,

10

11

572010). From E13.5 onward, they begin to express male-specific genes including Nanos  
58homolog 2 (*Nanos2*) (Suzuki and Saga, 2008), *Dnmt3l* (La Salle et al., 2004) and *Piwil4*  
59(Aravin et al., 2008) , which ensure normal male gametogenesis by regulating  
60spermatogonial stem cell properties.

61Although the cellular origins of oogonia and spermatogonia are well documented,  
62numerous open questions related to the molecular mechanisms underlying their  
63differentiation and cell fate remain. For instance, the transcriptional programs mediating  
64germ cell sex determination are incompletely understood, and the essential genes and  
65transcriptional regulators orchestrating such specifications remain poorly defined. In  
66developing ovaries, the factors regulating *Stra8* expression are still questioned, and in  
67developing testes it is unclear how the different events mediating the commitment and  
68differentiation of germ cells toward spermatogenesis are initiated and coordinated.  
69Finally, our understanding of how the somatic environment, whether gonadal or extra-  
70gonadal, directs the transcriptional cascade mediating entry into meiosis and the  
71commitment to oogenesis is still unclear.

72To date, most transcriptional analyses relevant for mouse or human germ cell sex  
73determination have been conducted using traditional methods such as microarrays or bulk  
74RNA-seq on either whole gonads or isolated germ cell populations at few selected time  
75points (Gkountela et al., 2015; Guo et al., 2015; Houmard et al., 2009; Irie et al., 2015;  
76Jameson et al., 2012; Lesch et al., 2013; Molyneaux et al., 2004; Rolland et al., 2008;  
77Rolland et al., 2011; Small et al., 2005; Soh et al., 2015; Tang et al., 2015). These studies,  
78although informative, provided only an average transcriptional summary, masking the  
79inherent variability of individual cells and lineage types and thereby limiting their

12

13

14

80capacity to reveal the precise dynamics of gene expression during germ cell sex  
81determination.

82To determine the sequence of transcriptional events that is associated with germ cell  
83commitment and differentiation toward oogenesis and spermatogenesis, we performed  
84time-series single-cell RNA sequencing (scRNA-seq) on developing gonads. We  
85recovered 14,750 germ cells from XX and XY gonads across five developmental time  
86points from E10.5 to E16.5, encompassing the entire developmental process of gonadal  
87sex determination and differentiation. We reconstructed the developmental trajectories of  
88male and female germ cells, characterized the associated genetic programs, and predicted  
89gene regulatory networks that regulate germ cell commitment and differentiation. In  
90particular, we found (i) sex-specific, sequential waves of master regulator genes during  
91germ cells differentiation, (ii) the meiotic initiator *Stra8* is regulated by positive and  
92negative master regulators acting in an antagonistic fashion, (iii) mRNA transcription and  
93mRNA splicing are often disconnected, either temporally or in a sex-specific manner, and  
94(iv) ectopic XY adrenal germ cells enter into meiosis with delay together with significant  
95alterations in ovarian-specific genes and upregulation of testis-specific genes.

96

## 97**Results**

### 98**A single-cell transcriptional atlas of germ cells sex determination and differentiation**

99To generate a gene expression atlas of germ cells sex determination, we used droplet-  
100based 3' end scRNA-seq (10x Genomics Chromium) of XX and XY gonads from mouse  
101embryos at five developmental stages (E10.5, E11.5, E12.5, E13.5, and E16.5) (**Fig. 1A**

15

16

17

102**and B**). The selected time points cover the entire process of gonadal sex determination  
103and span the emergence and differentiation of the major testicular and ovarian lineages  
104including the gonocytes. For each of the 10 conditions, we generated two independent  
105replicates from different pregnancies and sequenced an average of 10,000 cells. The  
106transcriptomes of the individual cells were sequenced at the depth of ~150,000 reads/cell.  
107Using ten well-established germ cell markers, namely *Ddx4*, *Dazl*, *Mael*, *Dppa3*, *Sycp3*,  
108*Pecam*, *Pou5f1*, *Stra8*, *Dmrt1*, and *Dnmt1*, we identified 14,750 germ cells among a total  
109of 92,267 cells (**Fig. S1A-C**) (see also **Supplementary information**). Among germ cells,  
1108,248 were XX (55.9%) and 6,502 were XY (44.1%). It included 70 cells from E10.5,  
111953 cells from E11.5, 4,365 cells from E12.5, 6,593 cells from E13.5 and 2,769 cells  
112from E16.5. As expected, the median count of UMIs and median number of detected  
113genes were higher in germ cells than in somatic cells with 22,584 versus 14,650 and  
1145,536 and 4,502, respectively (**Fig. S1D**) (Soumillon et al., 2013).

115

### 116**Cell lineage reconstruction identifies the dynamics of gene expression during XX** 117**and XY germ cell sex determination**

118UMAP projection of the 14,750 germ cells (**STAR Methods**) revealed that at early stages  
119(E10.5 and E11.5), the transcriptomes of XX and XY cells globally overlapped, while  
120cells from later stages formed two sex-specific branches (**Fig. 1C** and **D**). We then  
121analyzed how the transcriptomes of XX and XY cells progress during the process of sex  
122determination. To order cells along a pseudotime, we used ordinal regression modeling  
123(Telley et al., 2018; Teo et al., 2010) using prior knowledge about the developmental  
124stage of each cell capture (see **Fig. 1E**, **Fig. S1E**, **STAR Methods** and **Supplementary**

18

19

20

125**information**). We then represented the smoothed expression of the 3,013 top weighted  
126genes (**Table S1**) in two distinct ordinal regression models trained on XY and XX cells  
127with a double heatmap in which the center represents the earliest cells (pseudotime 0,  
128E10.5 cells) and the extremities represent the lineage endpoints (pseudotime 100, E16.5)  
129of XX germ cells (left) and XY germ cells (right), respectively (see **Supplementary**  
130**information**). The heatmap revealed that XX and XY germ cells diverged as early as  
131E12.5, exhibiting dynamic and sex-specific differentiation programs mediated by  
132thousands of genes (**Fig. S2**). In addition, using 67 well-known genes involved in mouse  
133germ cell pluripotency, sexual development and differentiation (Hill et al., 2018; Spiller  
134and Bowles, 2019), we confirmed that our single-cell data accurately recapitulated male  
135and female germ cell specification and was consistent with available literature (**Fig. 1F**).

136

### 137**Reconstructing Gene Regulatory Networks mediating germ cell sex determination**

138The identity and transcriptional state of a cell emerges from an underlying gene  
139regulatory network (GRN or regulome) in which the activities of a small number of key  
140transcription factors and co-factors regulate each other and their downstream target genes  
141(Aibar et al., 2017). To comprehensively infer the GRNs at play during XX and XY germ  
142cell sex determination, we applied the pySCENIC pipeline (Aibar et al., 2017) to our  
143single-cell data. In brief, SCENIC links cis-regulatory sequence information together with  
144scRNA-seq data. It first catalogs coexpression modules between transcription factors and  
145candidate target genes and then identifies modules for which the regulator's binding  
146motif is significantly enriched across target genes; it then creates regulons with only  
147direct target genes. Finally, the activity of each regulon is attributed to each cell, using

21

148the AUCell method (Aibar et al., 2017). For germ cells, we identified 837 regulons (512  
149positive and 325 negative regulons) containing 13,381 genes (**Table S2**). These genes  
150represented 62% of the total number of genes (21,553) detected in germ cells, indicating  
151that our GRN analysis was comprehensive, covering the majority of the germ cell  
152transcriptome. The size of each regulon varied from 2 to 2,625 genes, with a median size  
153of 19 genes. To compare how XX and XY germ cells acquire their sex-specific identity,  
154we selected the 394 positive regulons with AUCell-determined activity in more than  
1551,000 cells (activity score >0) and classified them according to their expression pattern  
156into 30 profiles or modules (M1 to M30) along pseudotime (**Fig. 2**). We represented the  
157smoothed regulon expression level of XX and XY germ cells with a double heatmap, in  
158which the center represents the starting point of the lineage (pseudotime 0, E10.5) and the  
159extremities represent the lineage endpoints (pseudotime 100, E16.5) of the XX germ cells  
160(left) and the XY germ cells (right), respectively (**Fig. 2**). Strikingly, the expression  
161patterns revealed numerous transient, sex-specific regulon profiles, mostly at late  
162developmental stages (late E13.5 and E16.5). Initially, two modules common to both XX  
163and XY gonocytes (M20 and M17) were observed at early developmental stages, which  
164were superseded sequentially by a handful of transient and overlapping sex-specific  
165regulon modules (M10, M16 and M29 in XX germ cells, and M12, M5 and M14 in XY  
166germ cells). By late E13.5 and E16.5, we noted numerous oogonia-specific (M1, M30,  
167M21, M28, M6, and M18) and spermatogonia-specific modules (M11, M24, M9, M22,  
168M4, M3, M2 and M23).

169We also selected 303 negative regulons with AUCell-determined activity in more than  
1701000 cells (activity score >0) and classified them according to their expression pattern



25

26

171into 10 modules (M1 to M10) (**Fig. S3**). Negative regulons all displayed activity in  
172opposition to their repressing master regulator (data not shown) and most of them showed  
173a pattern with high expression at early times points, and a progressive  
174downregulation/repression over time (M6, M1, M7 and M2 containing 264 regulons).  
175Among them, regulons of M1 and M7 could be distinguished by the onset of their sex-  
176specific repression: regulons from modules 1 and 7 started to be repressed at E16.5 and  
177E13.5 in XY germ cells, respectively, while in XX germ cells this repression was  
178observed at E13.5 and E16.5, respectively. We also detected 4 modules formed by 34  
179regulons with sequential transient expression (M3, M4, M8 and M10). Among these,  
180target genes belonging to regulons of module 3 were transiently repressed specifically in  
181XY germ cells, in accordance with the male-specific expression of their 12 master  
182regulators (data not shown).

183Overall, we identified 697 regulons whose activities were grouped under 40 modules  
184based on their sex-specific and temporal expression. The transient, sequential, and often  
185sex-specific profiles likely represent a sequential/hierarchical organization of regulatory  
186modules required for oogonia and spermatogonia differentiation.

187

### 188**Sex-specific, sequential waves of cell cycle gene expression during germ cells** 189**differentiation**

190Following PGC colonization of the gonad around E10.5, XX and XY gonocytes undergo  
191rapid mitotic proliferation while maintaining pluripotency (McLaren, 2003; Surani et al.,  
1922007). How germ cells exit the rapid proliferative phase and enter into mitotic arrest in  
193testes, or meiosis in ovaries, remains poorly understood. Our scRNA-seq analysis

27

194allowed us to comprehensively evaluate the expression of multiple key genes involved in  
195the pluripotency and proliferation of germ cells during their sex-specific differentiation.  
196We observed dynamic regulation and a strong sexual dimorphism among mitotic genes  
197between XX and XY germ cells (**Fig. 3** and **Fig. S4**). As expected, we observed in both  
198XX and XY gonocytes around E11.5 a downregulation of transcription factors mediating  
199pluripotency such as *Nanog*, *Pou5f1* (*Oct4*) as well as other pluripotency-associated  
200genes, including *Dppa2* and *Dppa4* (Maldonado-Saldivia et al., 2007; Pesce and Scholer,  
2012001; Surani et al., 2007; Western et al., 2005). The profile was similar for genes  
202regulating G1-S phase, including the genes encoding Cyclin A2, B1, D3 (*Ccna2*, *Ccnb1*,  
203*Ccnd3*) as well as E2F transcription factor genes *E2f1*, *E2f2*, *E2f3*, *E2f7*, and *E2f8*. In XY  
204germ cells, consistent with mitotic arrest in G0 between E12.5 and E14.5, we observed an  
205upregulation of cell-cycle inhibitors essential in the control of G1/G0 arrest, including  
206*Cdkn1b* (*p27<sup>Kip1</sup>*) and *Cdkn2b* (*p15<sup>INK4b</sup>*) around E13.5, followed by *Cdkn1c* (*p57<sup>Kip2</sup>*),  
207*Cdkn2a* (*p16<sup>INK4a</sup>*) and *Cdkn2c* (*p18<sup>INK4c</sup>*) at E16.5. These results confirmed and extended  
208previous studies (Western et al., 2008).

209In XX germ cells, we observed sequential waves of sex-specific upregulation of cell-  
210cycle genes including genes encoding Cyclin H, B2 and G1 (*Ccnh*, *Ccnb2*, *Ccng1*) and  
211the cell cycle inhibitor *Cdkn1a* (*p21<sup>Cip1</sup>*) around E12.5, cyclins C, E1, E2, D1 (*Ccnc*,  
212*Ccne1*, *Ccnde2*, *Ccnd1*), E2F transcription factor genes *E2f1*, *E2f2*, and the cell cycle  
213inhibitor genes *Cdkn2a* (*p16<sup>INK4a</sup>*), *Cdkn2c* (*p18<sup>INK4c</sup>*), *Cdkn2d* (*p19<sup>INK4d</sup>*) around E13.5, as  
214well as genes encoding Cyclins B3, C, O, J (*Ccnb3*, *Ccnc*, *Ccno*, *Ccnj*), and E2F  
215transcription factor genes *E2f4*, *E2f5* at E16.5. Overall, our scRNA-seq analysis

31

32

216accurately revealed the complex and sex-specific expression of cell cycle regulators when  
217germ cells exit the proliferative phase and either arrest mitotically or enter meiosis.

218

### 219**Predicting regulatory factors promoting meiosis and *Stra8* expression**

220Numerous studies have attempted to identify factors regulating the expression of *Stra8*  
221(Stimulated by Retinoic Acid 8 gene), which triggers the DNA duplication step that  
222precedes meiosis, thus engaging the meiotic program in germ cells (Baltus et al., 2006).  
223Retinoic acid (RA) has been proposed as a meiosis initiating substance (Bowles et al.,  
2242006; Koubova et al., 2006) as it induces *Stra8* mRNA accumulation in RA-treated P19  
225pluripotent cell lines (Oulad-Abdelghani et al., 1996), but recent lines of evidence  
226indicated that RA signaling is actually dispensable for entry into meiosis, but instead  
227stabilizes *Stra8* expression (Kumar et al., 2011; Vernet et al., 2019). To acquire a better  
228understanding of the signals instructing oogonia to transition from mitosis to meiosis, we  
229took advantage of our GRN analysis and investigated the positive and negative regulons  
230predicted to control the expression of *Stra8* and *Rec8*, a gene that encodes a component  
231of the cohesin complex accumulating during the meiotic S-phase. Consistent with the  
232literature, *Stra8* and *Rec8* were transiently upregulated in XX germ cells between E12.5  
233and E16.5, coinciding with the entry into meiosis (**Fig. 2B** and **4B**). GRN analysis  
234revealed that both *Stra8* and *Rec8* expressions were predicted to be regulated by a  
235combination of positive and negative master regulators (**Fig. 4A, B** and **Fig. S5**). In  
236particular, *Stra8* was predicted to be negatively regulated by the mitotic cohesin RAD21  
237and the Y-box binding protein YBX1. Both factors were downregulated specifically in  
238developing XX germ cells, while expression was maintained in XY germ cells (**Fig. 4B**).

33

34

35

239In parallel, the histone demethylase KDM5A (Jumonji/JARID1) and the transcription  
240factor PBX3, both preferentially expressed in XX over XY germ cells (**Fig. 4B**), were  
241predicted to be key positive regulators of *Stra8* (Ge et al., 2018). KDM5A is also a positive  
242regulator of *Ythdc2*, a gene encoding an RNA helicase that acts as critical regulator of the  
243transition from mitosis to meiosis in both male and female germlines (Bailey et al., 2017;  
244Gonczy et al., 1997). *Rec8* expression was predicted to also be negatively regulated by  
245RAD21 and YBX1, but positively regulated, among others, by KDM5A and MSX1 and  
246MSX2, two nuclear receptors known to promote meiosis initiation by maintaining or  
247enhancing *Stra8* expression (Le Bouffant et al., 2011). EZH2, a member of the polycomb  
248repressive complex 2 (PRC2) (Margueron and Reinberg, 2011), also appeared as a  
249positive regulator of *Rec8* expression that could act in concert with KDM5A to allow  
250control of chromatin opening and the correct timing of the mitosis-to-meiosis transition.  
251Overall, applying single-cell regulatory network inference to germ cell sex determination  
252leads to the prediction of new critical regulators of meiosis as well as *Stra8* and *Rec8*  
253expression.

254

### 255**Variable rates of mRNA splicing in male and female germ cells**

256mRNA splicing represents another powerful mechanism to modulate gene expression and  
257is known to contribute to the fine-tuning of cell differentiation programs (Kalsotra and  
258Cooper, 2011). To investigate splicing dynamics, we applied RNA velocity analysis to  
259the developing mouse germ cells to estimate the rates of nascent (unspliced) and mature  
260(spliced) transcripts during germ cell differentiation and evaluated whether there were  
261gene- or sex-specific differences in transcriptome kinetics. Velocity analysis considers

36

262both spliced and unspliced mRNA counts to predict developmental trajectories and speed  
263of cell state transitions (La Manno et al., 2018). Consistent with our previous analyses,  
264we observed strong directional flow toward the most differentiated germ cells, both in the  
265XX and XY branches (**Fig. S6**). We then ordered the cells according to our ordinal  
266regression model and examined the temporal progression of RNA biogenesis of XX and  
267XY germ cells during the process of sex determination. As expected, unspliced mRNAs  
268consistently preceded spliced mRNAs (**Fig. 5**). We also observed variation in  
269transcriptomic kinetics. For example, among the meiotic-related genes, *Rec8* and *Stra8*  
270exhibited fast kinetics with little differences between unspliced and spliced mRNAs  
271whereas genes such as *Hormad2*, *Msh5*, *Tex11*, and *Spo11* exhibited increasing delays in  
272spliced transcripts (**Fig. 5A**).

273We also investigated the rates of mature and immature transcripts of some of the genes  
274previously described as regulators of *Stra8* and *Rec8* expression (**Fig. 5B**) or as being  
275involved in mitosis (**Fig. 5C**). In several cases, we observed a significant disconnection  
276between transcription (i.e. the presence of unspliced mRNA) and the presence of mature  
277(spliced) mRNAs. For example, this was the case for the aforementioned RNA helicase  
278gene *Ythdc2*. *Ythdc2* exhibited increasing levels of unspliced transcripts in both XX and  
279XY cells (dotted lines in **Fig. 5B**, top panel) along pseudotime, but spliced mRNAs were  
280present only in XX germ cells (solid lines in **Fig. 5B**, top panel), suggesting male-specific  
281intronic retention or degradation of *Ythdc2* mRNAs. The Cyclin gene *Ccnb3* also  
282revealed sex-specific differences in gene splicing (**Fig. 5C**, fourth panel). While a  
283transient sequential increase of unspliced and spliced mRNAs was observed in XX germ  
284cells around E16.5, only unspliced mRNAs were observed in XY germ cells at late

40

41

285E16.5. A similar pattern was observed for Cyclin *Ccnd3* (**Fig. 5C**, bottom panel). Overall,  
286we observed gene-specific or sex-specific putative intronic retention in numerous genes,  
287emphasizing once more the importance of post-transcriptional regulation in male and  
288female germ cell lineages.

289

290**Ectopic adrenal germ cells also enters into meiosis, but numerous major**  
291**transcriptional regulators of oocyte differentiation are absent or downregulated**

292While the majority of PGCs migrate toward the gonadal ridges, a small fraction of germ  
293cells are lost along the way and end up in extragonadal organs such as the nearby adrenal  
294glands and mesonephroi (Heeren et al., 2016; Upadhyay and Zamboni, 1982; Zamboni  
295and Upadhyay, 1983). These adrenal germ cells, irrespective of their genetic sex, have  
296been reported to undergo meiosis, differentiate into oocytes and display morphological  
297characteristics identical to those of young oocytes in primordial follicles before  
298disappearing around 3 weeks of age (Upadhyay and Zamboni, 1982; Zamboni and  
299Upadhyay, 1983). To evaluate how an extragonadal somatic environment affects germ  
300cell fate, we investigated at the transcriptional level how ectopic adrenal germ cells enter  
301into meiosis and commit toward the female fate.

302Time-series 3' single-cell RNA sequencing of developing mouse adrenal cells from  
303E12.5, E13.5, E16.5, and E18.5 XY embryos identified 312 adrenal germ cells based on  
304the expression of the classical germ cell markers *Dazl*, *Ddx4* and *Mael* (see **STAR**  
305**methods**). Overall, we captured 187 adrenal germ cells at E12.5, 92 cells at E13.5, 18  
306cells at E16.5, and 15 cells at E18.5. The relatively low number of germ cells at later  
307stages may reflect the smaller proportion of germ cells in the growing adrenal glands.

42

308UMAP representation of these 312 XY adrenal germ cells combined with 14,718 gonadal  
309germ cells revealed that the transcriptome of XY adrenal germ cells partially overlapped  
310with the transcriptome of XX ovarian germ cells, suggesting that their transcriptomes are  
311similar and that XY adrenal germ cells enter into meiosis and differentiate into oocytes in  
312synchrony with gonadal oocytes (**Fig. 6A**). However, a more refined analysis  
313investigating the expression of selected key marker genes mediating germ cell  
314specification revealed a more complex picture. First, meiosis-related genes, including  
315*Stra8*, *Sycp1*, *Sync3*, *Spo11*, *Ccdc155*, *Dmc1*, *Mei1*, *Mei4*, *Meioc*, *Hormad1*, *Hormad2*,  
316*Msh5*, *Tex11*, *Prdm9* and *Smc1b* displayed similar profiles and expression levels between  
317XY adrenal germ cells and XX ovarian germ cells (**Fig. 6B** and **Fig. S7**). Only a slight  
318temporal delay was observed in adrenal germ cells. One notable exception was *Rec8*,  
319whose expression was blunted in adrenal compared to ovarian germ cells (**Fig. S7**). These  
320results confirmed published data that meiosis is not significantly affected in ectopic  
321adrenal germ cells (Upadhyay and Zamboni, 1982; Zamboni and Upadhyay, 1983).  
322While several genes and master regulators of oogonia differentiation were unaffected  
323(e.g. cyclins *Ccnb3*, *Ccne2*; *Pparg*; the histone demethylases *Kdm5a* and *Phf8*; *Brca2*)  
324(**Fig. S7**), we found numerous key female genes exhibiting either downregulation or a  
325testis-like profile. It included, for example, genes involved in the WNT- $\beta$ -catenin  
326pathway (*Axin2*, *Lef1*, and *Sp5*), the transcription factor genes *Msx1* and *Msx2*, the cell  
327cycle gene *E2f1*, and the oocyte-specific basic helix-loop-helix transcription factor gene  
328*Figla* (**Fig. 6B** and **Fig. S7**). Finally, we found that most genes and master regulators  
329involved in male germ cell fate were not upregulated in adrenal germ cells with few  
330notable exceptions including the male fate marker *Nanos2*, the NODAL target genes

46

47

331 *Lefty1* and *Lefty2*, the retinoic receptor gene *Rara*, the male germ cell regulator gene  
332 *Ctcf1* and the spermatogonial stem cell self-renewal gene *Lhx1* (**Fig. 6B** and **Fig. S7**).  
333 Overall, these results indicated that ectopic adrenal germ cells enter into meiosis at  
334 around the same time as ovarian germ cells, but numerous genes and master regulators  
335 related to both the female and male genetic programs were misregulated.

336

### 337 **Discussion**

338 This study represents the first large-scale scRNA-seq analysis of germ cells throughout  
339 the gonadal sex determination and differentiation process. The large number of individual  
340 germ cells profiled, both XX and XY, allowed us to reconstruct a continuous  
341 representation of changes in gene expression occurring during the process of gonadal  
342 differentiation, including the mitosis-to-meiosis switch in germ cells in developing  
343 ovaries, and spermatogonial commitment and differentiation in fetal testes. This  
344 represents a major advance beyond previous work and has broad implications for studies  
345 in germ cell development, sex determination and the etiology of human germ cell  
346 diseases.

347

348 How do germ cells commit to and acquire sex-specific fates during differentiation of the  
349 gonad into a testis or an ovary? Our experimental design based on scRNA sequencing to  
350 profile five developmental stages encompassing gonadal sex differentiation is well suited  
351 to tracing gene regulatory programs in which specific combinations of transcription  
352 factors drive sex- and cell type-specific transcriptomes in germ cells. Through  
353 computational analyses, we have comprehensively constructed the GRNs for XX and XY

48



354germ cells during the process of sex differentiation. We found that the gene regulatory  
355circuitry mediating germ cell sex determination is composed of 512 positive regulons that  
356can be grouped into 30 modules, each of them exhibiting transient, sequential and often  
357sex-specific profiles. The fact that regulons are grouped into modules that display  
358transient sex-specific profiles suggests a sequential organization of regulatory modules  
359that work together to fine-tune the interrelated cellular events that lead to XX and XY  
360germ cell differentiation. The master regulator genes present in each specific module may  
361not be controlling a single cellular event, but instead a combination of overlapping sex-  
362specific developmental processes including mitotic arrest, suppression of pluripotency  
363genes, prospermatogonia commitment and *de novo* methylation for XY germ cells, as  
364well as entry into meiosis, and suppression of pluripotency genes for XX germ cells.

365This regulome analysis also provides an opportunity to identify new critical master  
366regulators of germ cell sex determination. While various master regulators have already  
367been implicated in playing a key role in pluripotency and germ cell sex-specific  
368commitment and differentiation, such as *Dazl*, *Pou5f1*, *Dmc1*, *Rec8*, *Stra8*, *Nodal*,  
369*Nanos2*, and *Dnmt3l*, our analysis predicted more than 800 positive and negative regulons  
370(**Fig. 2**, **Fig. S3** and **Table S2**), including a large set of new potentially critical regulators  
371of germ cell commitment and differentiation, for example KDM5A, KDM5B, NR3C1  
372and PHF8. While most of these remain predictions, they provide an important framework  
373and guide for future experimental investigation.

374Identifying the molecules controlling the fundamental decision of germ cells to exit the  
375cell cycle and enter meiosis represents a major challenge for the reproductive medicine  
376community. An example of the usefulness of such a regulome is provided by the

377prediction of new factors positively and negatively regulating *Stra8* expression. STRA8  
378is the only gatekeeper described to date that engages the meiotic program in developing  
379female germ cells (Baltus et al., 2006). The onset of *Stra8* expression in germ cells of the  
380developing ovary and its lack of expression in germ cells of the developing testis led to a  
381search for the presence of the female “meiosis-initiating substance” (MIS) or male  
382“meiosis-preventing substance” (MPS) (Kocer et al., 2009; McLaren and Southee, 1997).  
383While RA has emerged as a potential MIS (Bowles et al., 2006; Koubova et al., 2006),  
384recent reports revealed that female germ cells enter meiosis normally even in the absence  
385of RA signaling (Kumar et al., 2011; Vernet et al., 2019) . Our regulome analysis  
386revealed that the expression of both *Stra8* and *Rec8* is regulated by a combination of  
387positive and negative master regulators. Among them, two factors, RAD21 and YBX1,  
388are predicted to act as negative regulators of both *Stra8* and *Rec8* expression. *Rad21* and  
389*Ybx1* genes are initially expressed in both developing ovary and testis but are specifically  
390downregulated in developing ovaries at the time of entry into meiosis. Among the  
391positive regulators, we found the transcription factor PBX3 and KDM5A, a histone  
392demethylase, transiently expressed in XX germ cells around E13.5 when *Stra8* is  
393upregulated. KDM5A has recently been shown to regulate temperature-dependent sex  
394determination in red-eared slider turtle by promoting the transcription of the male sex-  
395determining gene *Dmrt1* (Ge et al., 2018). Interestingly, KDM5A also acts as a negative  
396regulator for the expression of *Rad21* and *Ybx1*, suggesting mutual antagonism between  
397the male RAD21/YBX1 factors and KDM5A/PBX3 female factors in regulating *Stra8*  
398expression and the entry into meiosis.

399Another relevant master regulator is the nuclear receptor MSX2, a member of the Msh  
400homeobox gene family composed of three members (*Msx1*, 2 and 3). MSX1 and MSX2  
401function cooperatively to control the regulation of primordial germ cell migration (Sun et  
402al., 2016) and later in XX germ cells to promote meiosis initiation by maintaining or  
403enhancing *Stra8* expression (Le Bouffant et al., 2011). We found that *Msx2* regulon  
404activity as well as *Msx1* and *Msx2* gene expression are present in module 16, consistent  
405with their dual function (**Fig. 2** and **Fig. 4B**). *Msx2* is expressed in both XX and XY  
406PGCs by E10.5 and E11.5 and then is rapidly downregulated in XY germ cells. In  
407contrast, *Msx1* is specifically upregulated in XX germ cells from E11.5 onward with a  
408peak around E13.5 (**Fig. 4B**). We found 66 predicted target genes regulated positively by  
409the master regulator MSX2. Among these genes, we found for example *Msx1*, *Rec8*,  
410*Dlx3*, *Lef1*, *Sp5*, *Axin2*, *E2f1*, *Notch1* (**Table S2**).

411As alluded above, two histone demethylases KDM5A (also called Jarid1A, RBP2) and  
412KDM5B (also called Jmjd3, Jarid1B or RBP2-H1) have been identified as master  
413regulators specifically expressed in E13.5 XX germ cells (**Fig. 2** and **Fig. 4B**). KDM5A  
414and KDM5B are histone demethylases that specifically demethylate H3K4me2/me3 and  
415H3K27me3, respectively. Both histone demethylases are involved in epigenetic  
416regulation of transcription and are essential for embryonic development (Christensen et  
417al., 2007; Dahl et al., 2016; Klose et al., 2007). We found that both *Kdm5a* and *Kdm5b*  
418genes are transiently expressed in XX germ cells around E13.5 in modules 13 and 14,  
419respectively (**Fig. 2** and **Fig. 4B**). In male rat, KDM5A has been shown to be also  
420expressed in quiescent gonocytes, mitotic gonocytes and spermatogonia at 6 dpp, and in  
421spermatocytes at 12, 15 and 18 dpp (Nishio et al., 2014). We identified more than 2625

58

59

422and 1116 predicted positive target genes for KDM5A and KDM5B in germ cells  
423including *Ctnnb1* (beta catenin 1), DEAD-Box Helicases *Ddx4* and *Ddx6*, the Retinoic  
424Acid Receptor alpha (*Rara*) and the Lysine Demethylase *Kdm2a*, *Kdm2b* and *Kdm3a*, the  
425RNA binding protein *Dazl* and the Mitogen-Activated Protein Kinase Kinase Kinase 4  
426*Map3k4* (**Table S2**). The biological functions of KDM5A and KDM5B, particularly in  
427the context of XX germ cell meiosis regulation and oocyte differentiation remains poorly  
428characterized.

429

### 430**Splicing kinetics and intron retention as post-transcriptional regulation in** 431**developing germ cells**

432Cellular RNAs are regulated at multiple stages, including transcription, RNA maturation,  
433and degradation. To study posttranscriptional regulation, and more precisely RNA  
434processing, during the process of germ cell sex determination we evaluated the  
435abundance of nascent (unspliced) and mature (spliced) mRNAs in the 14,750 XX and XY  
436germ cells. We exploited the fact that 23% of reads contained unspliced intronic  
437sequences when performing single-cell RNA-seq based on the 10x Genomics Chromium  
438protocols (La Manno et al., 2018). Although these splicing events are usually located at  
439the very 3' end of mRNA transcripts due to the oligo-dT-based protocol, the RNA  
440velocity analysis approach can be used to directly estimate unspliced and spliced mRNAs  
441present in single cells (La Manno et al., 2018).

442We found a large variation in splicing kinetics. When analyzing, for example, meiosis-  
443related genes we identified genes with rapid splicing (e.g. *Stra8*, *Rec8*) as well as genes  
444with variable delays in splicing (e.g. *Hormad2*, *Sycp1*, *Spo11*, *Tex11*). This suggested that

60

61

62

445splicing retention is another layer of post-transcriptional regulation in developing germ  
446cells, ensuring precise temporal expression of meiotic and differentiation genes. In  
447addition, we identified genes with sex-specific intronic retention/degradation patterns.  
448One example is the RNA helicase YTHDC2, a critical regulator of the transition from  
449mitosis to meiosis in both male and female germline (Bailey et al., 2017; Gonczy et al.,  
4501997). YTHDC2, through post-transcriptional control of RNA, both down-regulates the  
451mitotic program and facilitates the proper expression of meiotic and differentiation genes.  
452*Ythdc2* mutant male and female mice are infertile and mutant germ cells show defects  
453soon after the mitosis to meiosis transition (Bailey et al., 2017). Consistent with its role in  
454ensuring a transition from mitosis to meiosis, *Ythdc2* expression profile displayed a  
455female-specific upregulation between E13.5-E16.5. However, RNA velocity analysis  
456revealed the presence of unspliced *Ythdc2* mRNAs in both XX and XY germ cells,  
457suggesting that in XY germ cells these unspliced mRNAs remain immature or are  
458degraded in a sex-specific manner. Two other examples are provided by the Cyclins  
459*Ccnb3* and *Ccnd3*, which both displayed increasing levels of unspliced mRNAs in XY  
460germ cells without the presence of mature mRNAs. Intron retention has been shown to be  
461a prominent feature of the meiotic transcriptome of mouse spermatocytes (Naro et al.,  
4622017). It can either favor accumulation, storage, and timely usage of specific transcripts  
463during highly organized cell differentiation programs or cause transcript instability at  
464specific developmental transitions (Edwards et al., 2016; Naro et al., 2017; Pimentel et  
465al., 2016; Wong et al., 2013; Yap et al., 2012). The temporal or sex-specific variation in  
466intronic retention appears to be surprisingly frequent during the process of germ cell sex  
467determination and may ensure proper and timely expression of selected transcripts.

63

64

65

468

469 **Comparing adrenal and gonadal germ cells development provides a tool to**

470 **investigate the importance of the somatic environment in the process of oogenesis**

471 By comparing the transcriptome of adrenal and gonadal germ cells, we have been able to

472 investigate how germ cells respond to three different somatic environments: the adrenal,

473 ovarian and testicular environments. It allowed us to also investigate whether the gene

474 regulatory circuitries mediating germ cell sex determination, composed of 837 regulons,

475 are interconnected or act independently. The dynamic expression pattern of key marker

476 genes of meiosis is strikingly similar in both adrenal and ovarian germ cells with a slight

477 delay in adrenal germ cells. It suggests that the initiation and maintenance of meiosis

478 proceeds relatively normally in adrenal germ cells. However, we also observed a

479 significant alteration in the expression of some key female master regulator genes as well

480 as upregulation of male master regulator genes, indicating that the somatic environment

481 in the adrenal gland cannot completely support a female fate for these gonocytes. In

482 particular, we observed a lack of upregulation of genes involved in the canonical

483 WNT/ $\beta$ -catenin signaling pathway (*Axin2*, *Lef1*, and *Sp5*), suggesting that germ cells in

484 this environment are unable to respond to WNT signals, or to express their receptors.

485 This may also explain the slight delay in adrenal meiosis progression (Chassot et al.,

486 2011; Chassot et al., 2008; Naillat et al., 2010). Other master regulator genes such as the

487 transcription factor genes *Msx1* and *Msx2*, *Cdx2* and the oocyte-specific basic helix-loop-

488 helix transcription factor gene *Figla* also displayed significant alteration. Interestingly,

489 the absence of *Msx1* and *Msx2* expression may explain why *Rec8* expression, but not

490 other meiotic genes such as *Stra8*, is blunted in adrenal germ cells (**Fig. S7**). Based on

66

68

491our GRN analysis, we found that both MSX1 and MSX2 are strong positive regulators of  
492*Rec8* expression (**Fig. 4A**). Concerning male-specific master regulators, the large  
493majority of them are not expressed in XY adrenal germ cells but with few notable  
494exceptions including *Nanos2*, *Lefty1*, *Lefty2*, *Rara*, *Ctcf1*, *Lhx1*. Overall, the adrenal  
495environment does not provide all the necessary signal(s) required to commit germ cells to  
496oogenesis, resulting in adrenal germ cells characterized by an altered identity and delayed  
497meiosis.

498

499Compiling single cell transcriptomes from mouse germ cells at five developmental stages  
500during the process of sex determination, both in gonadal and extragonadal tissues,  
501allowed us to provide a comprehensive insight into the sex-specific genetic programs and  
502gene regulatory networks that regulate germ cell commitment toward a male or female  
503fate. As such, we have created a valuable and rich resource for the broad biology  
504community that should provide insights into how this fundamental decision impacts the  
505etiology of infertility and human gonadal germ cell tumours, two of the main clinical  
506consequences of defects in germ cell sex determination.

507

### 508**Acknowledgments:**

509This work was supported by grants from the Swiss National Science Foundation (grants  
51031003A\_173070 and 51PHI0-141994) and by the Département de l'Instruction Publique  
511of the State of Geneva (to S.N.). We thank Luciana Romano and Deborah Penet for the  
512sequencing, Cécile Gameiro and Gregory Schneiter (Flow Cytometry Facility, University  
513of Geneva), the team of the Animal Facility (Faculty of Medicine, University of Geneva),

70

71

514Julien Prados (Basic Neuroscience, University of Geneva) for his help for pseudotime  
515computation and Valentin Durand Graphic Design for help with artwork. We thank also  
516Andy Greenfield, the members of the Nef and Dermitzakis laboratories for helpful  
517discussion and critical reading of the manuscript.

### 518**Author Contributions**

519Conceptualization, S.N.; data generation and investigation, C.M., Y.N., P.S., A.A.C., I.S.  
520and F.K.; Formal Analysis and Data Curation, C.M and P.S.; Writing – Original Draft,  
521S.N., C.M., and M.-C.C.; Funding Acquisition, S.N., and E.T.D.; Resources, S.N., and  
522E.T.D.; Supervision, S.N., and E.T.D.

### 523**Declaration of Interests**

524The authors declare no competing interests

525



73

74

526**STAR Methods:**

527**KEY RESOURCES TABLE**

| REAGENT or RESOURCE                                  | SOURCE                   | IDENTIFIER                                                                                                                                        |
|------------------------------------------------------|--------------------------|---------------------------------------------------------------------------------------------------------------------------------------------------|
| <b>Chemicals, Peptides, and Recombinant Proteins</b> |                          |                                                                                                                                                   |
| Trypsin-EDTA (0.05%), phenol red                     | Thermo Fisher Scientific | 25300054                                                                                                                                          |
| DPBS, no calcium, no magnesium                       | Thermo Fisher Scientific | 14190144                                                                                                                                          |
| Fetal bovine serum                                   | Thermo Fisher Scientific | 26140087                                                                                                                                          |
| Draq7™ #B25595                                       | Beckman Coulter          | B25595                                                                                                                                            |
| <b>Critical Commercial Assays</b>                    |                          |                                                                                                                                                   |
| Papain dissociation system                           | Worthington              | LK003150                                                                                                                                          |
| Chromium™ i7 Multiplex Kit                           | 10x Genomics             | 120262                                                                                                                                            |
| Chromium™ Single Cell 3' Library & Gel Bead Kit v2   | 10x Genomics             | 120237                                                                                                                                            |
| Chromium™ Single Cell A Chip Kit                     | 10x Genomics             | 1000009                                                                                                                                           |
| Qubit dsDNA High Sensitivity                         | Life Technologies        | Q32854                                                                                                                                            |
| Agilent High Sensitivity DNA Kit Reagents            | Agilent                  | 5067-4626                                                                                                                                         |
| <b>Deposited Data</b>                                |                          |                                                                                                                                                   |
| Raw data, normalized counts                          | GEO                      | GSE136220                                                                                                                                         |
| Scripts for analysis                                 | GitHub                   | Available soon                                                                                                                                    |
| <b>Experimental Models: Organisms/Strains</b>        |                          |                                                                                                                                                   |
| Mus musculus: CD-1                                   | Charles River            | Strain code 022                                                                                                                                   |
| Mus musculus: CD-1-Tg( <i>Nr5a1</i> GFP)             | (Stallings, 2002)        | N/A                                                                                                                                               |
| <b>Oligonucleotides</b>                              |                          |                                                                                                                                                   |
| Primers for sex genotyping                           | (McFarlane et al., 2013) | N/A                                                                                                                                               |
| <b>Software and Algorithms</b>                       |                          |                                                                                                                                                   |
| Cell Ranger (version 2.3)                            | 10X                      | <a href="http://www.10xgenomics.com">www.10xgenomics.com</a>                                                                                      |
| Python (version 3.6)                                 | Python                   | Pyth                                                                                                                                              |
| R (version version 3.6.1)                            | R-Project                | <a href="https://www.R-project.org/">https://www.R-project.org/</a>                                                                               |
| Seurat (Version 2.3.0)                               | Stuart et al, 2018       |                                                                                                                                                   |
| heatmaps (version 1.8.0)                             | Bioconductor             | <a href="https://bioconductor.org/packages/release/bioc/html/heatmaps.html">https://bioconductor.org/packages/release/bioc/html/heatmaps.html</a> |
| pheatmap (version 1.0.12)                            | Bioconductor             | <a href="https://github.com/raivokolde/pheatmap">https://github.com/raivokolde/pheatmap</a>                                                       |
| Bmm (version 4.1)                                    | (Teo et al., 2010)       |                                                                                                                                                   |
| ggplot2 (version 3.2.0)                              | (Wickham, 2009)          | <a href="https://ggplot2.tidyverse.org">https://ggplot2.tidyverse.org</a>                                                                         |
| scanpy (version 1.4.4)                               | (Wolf et al, 2018)       | <a href="https://github.com/theislab/scanpy">https://github.com/theislab/scanpy</a>                                                               |
| scvelo (version 0.1.19)                              |                          | <a href="https://github.com/theislab/scvelo">https://github.com/theislab/scvelo</a>                                                               |
| matplotlib (version 3.0.3)                           |                          |                                                                                                                                                   |
| pyscenic (version 0.9.14)                            | (Aibar et al., 2017)     |                                                                                                                                                   |
| bbknn (version 1.3.5)                                | (Park et al, 2018)       | <a href="https://github.com/Teichlab/bbknn">https://github.com/Teichlab/bbknn</a>                                                                 |
| 528 velocyto (version 0.17.8)                        | (La Manno et al 2018)    | <a href="http://velocyto.org/">http://velocyto.org/</a>                                                                                           |

### 530 **Contact for Reagent and Resource Sharing**

531 Further information and requests for resources and reagents should be directed to and will

532 be fulfilled by the Lead Contact, Serge Nef ([serge.nef@unige.ch](mailto:serge.nef@unige.ch)).

533

### 534 **Experimental Model Details**

#### 535 **Transgenic Mice**

536 All animal work was conducted according to the ethical guidelines of the Direction

537 Générale de la Santé of the Canton de Genève (experimentation ID GE/57/18).

538 *Tg(Nr5a1-GFP)* mouse strain was described previously (Stallings et al., 2002) and has

539 been maintained on a CD1 genetic background.

540

#### 541 **Method Details**

#### 542 **Mouse urogenital ridges, testes, ovaries and adrenal glands collection**

543 CD-1 female mice were bred with heterozygous *Tg(Nr5a1-GFP)* transgenic male mice.

544 Adult females were time-mated and checked for the presence of vaginal plugs the next

545 morning (E0.5). E10.5 (8±2 tail somites (ts)), E11.5 (19±4 ts), E12.5, E13.5, E16.5 and

546 E18.5 embryos were collected and the presence of the *Nr5a1-GFP* transgene was

547 assessed under UV light. Sexing of E10.5 and E11.5 embryos was performed by PCR

548 with a modified protocol from (McFarlane et al., 2013). Urogenital ridges from each sex,

549 XY adrenal glands, testes or ovaries were pooled for tissue dissociation.

550

#### 551 **Single cell suspension and library preparations**

82

83

552 Urogenital ridges and adrenal glands were enzymatically dissociated at 37°C for 20 and  
553 40 minutes, respectively, using the Papain dissociation system (Worthington  
554 #LK003150). Cells were resuspended in DMEM 2%FBS, filtered through a 70 µm cell  
555 strainer and stained with the dead cell marker Draq7™ (Beckman Coulter, #B25595).  
556 Viable single cells were collected on a BD FACS Aria II by excluding debris (side scatter  
557 vs. forward scatter), dead cells (side scatter vs. Draq7 staining), and doublets (height vs.  
558 width). Testes and ovaries (from E12.5 to E16.5) were enzymatically dissociated at 37°C  
559 during 15 minutes in Trypsin-EDTA 0.05% (Gibco #25300054), resuspended in DMEM  
560 2%FBS and filtered through a 70 µm cell strainer. After counting, 3000 to 7000 single  
561 cells were loaded on a 10x Chromium instrument (10x Genomics). Single-cell RNA-Seq  
562 libraries were prepared using the Chromium Single Cell 3' v2 Reagent Kit (10x  
563 Genomics) according to manufacturer's protocol. Each condition (organ, sex and  
564 developmental stage) was performed in two biological independent replicates.

565

### 566 **Sequencing**

567 Library quantification was performed using the Qubit fluorometric assay with dsDNA HS  
568 Assay Kit (Invitrogen). Library quality assessment was performed using a Bioanalyzer  
569 Agilent 2100 with a High Sensitivity DNA chip (Agilent Genomics). Libraries were  
570 diluted, pooled and sequenced on an Illumina HiSeq4000 using paired-end 26 + 98 bp as  
571 the sequencing mode. Libraries were sequenced at a targeted depth of 100 000 to 150 000  
572 total reads per cell. Sequencing was performed at the Health 2030 Genome Center,  
573 Geneva.

574

84

85

86

## 575 **Bioinformatic Analysis**

### 576 **Data processing with the Cell Ranger package, cell selection and in-house quality**

#### 577 **controls**

578 Computations were performed at the Vital-IT Center for high-performance computing of  
579 the SIB (Swiss Institute of Bioinformatics) (<http://www.vital-it.ch>). Demultiplexing,  
580 alignment, barcode filtering and UMI counting were performed with the Cell Ranger v2.1  
581 pipeline (10x Genomics). Algorithms and versions used are listed in the key resources  
582 table. Data were mapped to the mouse reference genome GRCm38.p5 in which the eGFP  
583 (NC\_011521.1) combined with the bovine GH 3'-splice/polyadenylation signals  
584 (Stallings et al., 2002) (NM\_180996.1) sequences have been added.

585 Cell-associated barcode selection and quality checks were performed with in-house tools.

586 (see **Supplementary information** for details)

587

#### 588 **Gene expression normalization**

589 UMI counts per gene and per cell were divided by the total UMI detected in the cell,  
590 multiplied by a scale factor of 10,000 and log transformed.

591

#### 592 **Germ cells selection**

593 After barcode filtering based on the unique molecular identifiers (UMI) distribution, we  
594 obtained 92,267 cells. It included 14,904 cells from E10.5, 16,581 cells from E11.5,  
595 19,551 cells from E12.5, 25,012 cells from E13.5, and 16,219 cells from E16.5. Among  
596 the 52,463 XY cells and the 39,804 XX cells, the median number of UMIs was 17,493  
597 and 17,655 and the median number of detected genes was 4,802 and 4,658, respectively.

87

88

89

598 To determine which one were germ cells, we selected all genes detected in more than 50  
599 cells, and performed ICA on log normalized values. To assess for batch effect, we built a  
600 nearest neighbor graph using BBKNN function (BBKNN package). Clustering was  
601 performed using Scanpy Louvain method with resolution 1 and UMAP were generated  
602 using Scanpy UMAP method with default parameters. We selected clusters with a strong  
603 expression of 10 well-known germ cells markers (see **Supplementary table S3** and  
604 **Supplementary information** for details).

605

#### 606 **Pseudotime ordering of the cells**

607 To order the cells along a pseudotime, we took advantage of the discrete prior knowledge  
608 we have about the embryonic day at which each cell were harvested and generated an  
609 ordinal regression model (adapted from (Teo et al., 2010)) to obtain a continuous  
610 pseudotime score reflecting the differentiation status of the cells (see **Supplementary**  
611 **information** for details).

612

#### 613 **Gene regulatory network generation**

614 GRN analysis was generated using pyScenic package (see **Supplementary information**  
615 for details).

616

#### 617 **Regulons hierarchical clustering**

618 Regulons were clustered using ward.d hierarchical clustering on the AUC matrix with  
619 Spearman correlation distance. Modulons were determined using cutree with k=10 for  
620 negative regulons and k=30 for positive regulons.

90

91

92

621

## 622 **Heatmaps and expression curves**

623 Heatmaps were generated using R (packages pheatmap and heatmaps). Expression curves

624 were generated using ggplot2 (see **Supplementary information** for details).

625

## 626 **Network visualization**

627 Network views and layouts were generated with Cytoscape V3.7.1.

628

## 629 **Velocity analysis**

630 To generate spliced and unspliced counts data, the velocity.py script from velocityto

631 package was called on each bam file with aforementioned reference genome annotation

632 (see **Supplementary information** for details).

633

## 634 **Ectopic adrenal germ cells analysis**

635 The analysis was performed using aforementioned steps: log normalization, ICA,

636 neighbor graph, and clustering with the same parameters. Germ cell clusters were

637 selected with the same 10 germ cell marker genes (see **Supplementary information** for

638 details). For pseudotime ordering of the cells, a model was trained on gonadal cells only

639 and the pseudotime for adrenal germ cells was predicted from it.

640

94

95

#### 641 **Data and source code availability**

642 Germ cells single-cell RNA-seq data is available on GEO (accession number  
643 GSE136220). Both adrenal and gonadal gene expression data are included in  
644 ReproGenomics Viewer (Darde et al., 2019; Darde et al., 2015).

645

646



## 647References

- 648Aibar, S., Gonzalez-Blas, C.B., Moerman, T., Huynh-Thu, V.A., Imrichova, H., Hulselmans, G.,  
649Rambow, F., Marine, J.C., Geurts, P., Aerts, J., *et al.* (2017). SCENIC: single-cell regulatory  
650network inference and clustering. *Nat Methods* *14*, 1083-1086.
- 651Aravin, A.A., Sachidanandam, R., Bourc'his, D., Schaefer, C., Pezic, D., Toth, K.F., Bestor, T.,  
652and Hannon, G.J. (2008). A piRNA pathway primed by individual transposons is linked to de  
653novo DNA methylation in mice. *Mol Cell* *31*, 785-799.
- 654Bailey, A.S., Batista, P.J., Gold, R.S., Chen, Y.G., de Rooij, D.G., Chang, H.Y., and Fuller, M.T.  
655(2017). The conserved RNA helicase YTHDC2 regulates the transition from proliferation to  
656differentiation in the germline. *Elife* *6*.
- 657Baltus, A.E., Menke, D.B., Hu, Y.C., Goodheart, M.L., Carpenter, A.E., de Rooij, D.G., and  
658Page, D.C. (2006). In germ cells of mouse embryonic ovaries, the decision to enter meiosis  
659precedes premeiotic DNA replication. *Nat Genet* *38*, 1430-1434.
- 660Bowles, J., Knight, D., Smith, C., Wilhelm, D., Richman, J., Mamiya, S., Yashiro, K.,  
661Chawengsaksophak, K., Wilson, M.J., Rossant, J., *et al.* (2006). Retinoid signaling determines  
662germ cell fate in mice. *Science* *312*, 596-600.
- 663Bullejos, M., and Koopman, P. (2004). Germ cells enter meiosis in a rostro-caudal wave during  
664development of the mouse ovary. *Mol Reprod Dev* *68*, 422-428.
- 665Byskov, A.G., and Saxen, L. (1976). Induction of meiosis in fetal mouse testis in vitro. *Dev Biol*  
666*52*, 193-200.
- 667Chassot, A.A., Gregoire, E.P., Lavery, R., Taketo, M.M., de Rooij, D.G., Adams, I.R., and  
668Chaboissier, M.C. (2011). RSP01/beta-catenin signaling pathway regulates oogonia  
669differentiation and entry into meiosis in the mouse fetal ovary. *PLoS One* *6*, e25641.
- 670Chassot, A.A., Ranc, F., Gregoire, E.P., Roepers-Gajadien, H.L., Taketo, M.M., Camerino, G., de  
671Rooij, D.G., Schedl, A., and Chaboissier, M.C. (2008). Activation of beta-catenin signaling by  
672Rspo1 controls differentiation of the mammalian ovary. *Hum Mol Genet* *17*, 1264-1277.
- 673Christensen, J., Agger, K., Cloos, P.A., Pasini, D., Rose, S., Sennels, L., Rappsilber, J., Hansen,  
674K.H., Salcini, A.E., and Helin, K. (2007). RBP2 belongs to a family of demethylases, specific for  
675tri- and dimethylated lysine 4 on histone 3. *Cell* *128*, 1063-1076.
- 676Dahl, J.A., Jung, I., Aanes, H., Greggains, G.D., Manaf, A., Lerdrup, M., Li, G., Kuan, S., Li, B.,  
677Lee, A.Y., *et al.* (2016). Broad histone H3K4me3 domains in mouse oocytes modulate maternal-  
678to-zygotic transition. *Nature* *537*, 548-552.
- 679Darde, T.A., Lecluze, E., Lardenois, A., Stevant, I., Alary, N., Tuttelmann, F., Collin, O., Nef, S.,  
680Jegou, B., Rolland, A.D., *et al.* (2019). The ReproGenomics Viewer: a multi-omics and cross-  
681species resource compatible with single-cell studies for the reproductive science community.  
682*Bioinformatics*.
- 683Darde, T.A., Sallou, O., Becker, E., Evrard, B., Monjeaud, C., Le Bras, Y., Jegou, B., Collin, O.,  
684Rolland, A.D., and Chalmel, F. (2015). The ReproGenomics Viewer: an integrative cross-species  
685toolbox for the reproductive science community. *Nucleic Acids Res* *43*, W109-116.
- 686Edwards, C.R., Ritchie, W., Wong, J.J., Schmitz, U., Middleton, R., An, X., Mohandas, N.,  
687Rasko, J.E., and Blobel, G.A. (2016). A dynamic intron retention program in the mammalian  
688megakaryocyte and erythrocyte lineages. *Blood* *127*, e24-e34.
- 689Evans, E.P., Ford, C.E., and Lyon, M.F. (1977). Direct evidence of the capacity of the XY germ  
690cell in the mouse to become an oocyte. *Nature* *267*, 430-431.
- 691Ge, C., Ye, J., Weber, C., Sun, W., Zhang, H., Zhou, Y., Cai, C., Qian, G., and Capel, B. (2018).  
692The histone demethylase KDM6B regulates temperature-dependent sex determination in a turtle  
693species. *Science* *360*, 645-648.

- 694Gkountela, S., Zhang, K.X., Shafiq, T.A., Liao, W.W., Hargan-Calvopina, J., Chen, P.Y., and  
695Clark, A.T. (2015). DNA Demethylation Dynamics in the Human Prenatal Germline. *Cell* *161*,  
6961425-1436.
- 697Gonczy, P., Matunis, E., and DiNardo, S. (1997). bag-of-marbles and benign gonial cell neoplasm  
698act in the germline to restrict proliferation during *Drosophila* spermatogenesis. *Development* *124*,  
6994361-4371.
- 700Guo, F., Yan, L., Guo, H., Li, L., Hu, B., Zhao, Y., Yong, J., Hu, Y., Wang, X., Wei, Y., *et al.*  
701(2015). The Transcriptome and DNA Methylome Landscapes of Human Primordial Germ Cells.  
702*Cell* *161*, 1437-1452.
- 703Heeren, A.M., He, N., de Souza, A.F., Goercharn-Ramlal, A., van Iperen, L., Roost, M.S., Gomes  
704Fernandes, M.M., van der Westerlaken, L.A., and Chuva de Sousa Lopes, S.M. (2016). On the  
705development of extragonadal and gonadal human germ cells. *Biol Open* *5*, 185-194.
- 706Hill, P.W.S., Leitch, H.G., Requena, C.E., Sun, Z., Amouroux, R., Roman-Trufero, M.,  
707Borkowska, M., Terragni, J., Vaisvila, R., Linnett, S., *et al.* (2018). Epigenetic reprogramming  
708enables the transition from primordial germ cell to gonocyte. *Nature* *555*, 392-396.
- 709Houmard, B., Small, C., Yang, L., Nalwai-Cecchini, T., Cheng, E., Hassold, T., and Griswold, M.  
710(2009). Global gene expression in the human fetal testis and ovary. *Biol Reprod* *81*, 438-443.
- 711Irie, N., Weinberger, L., Tang, W.W., Kobayashi, T., Viukov, S., Manor, Y.S., Dietmann, S.,  
712Hanna, J.H., and Surani, M.A. (2015). SOX17 is a critical specifier of human primordial germ  
713cell fate. *Cell* *160*, 253-268.
- 714Jameson, S.A., Natarajan, A., Cool, J., DeFalco, T., Maatouk, D.M., Mork, L., Munger, S.C., and  
715Capel, B. (2012). Temporal transcriptional profiling of somatic and germ cells reveals biased  
716lineage priming of sexual fate in the fetal mouse gonad. *PLoS Genet* *8*, e1002575.
- 717Kalsotra, A., and Cooper, T.A. (2011). Functional consequences of developmentally regulated  
718alternative splicing. *Nat Rev Genet* *12*, 715-729.
- 719Klose, R.J., Yan, Q., Tothova, Z., Yamane, K., Erdjument-Bromage, H., Tempst, P., Gilliland,  
720D.G., Zhang, Y., and Kaelin, W.G., Jr. (2007). The retinoblastoma binding protein RBP2 is an  
721H3K4 demethylase. *Cell* *128*, 889-900.
- 722Kocer, A., Reichmann, J., Best, D., and Adams, I.R. (2009). Germ cell sex determination in  
723mammals. *Mol Hum Reprod* *15*, 205-213.
- 724Koubova, J., Hu, Y.C., Bhattacharyya, T., Soh, Y.Q., Gill, M.E., Goodheart, M.L., Hogarth, C.A.,  
725Griswold, M.D., and Page, D.C. (2014). Retinoic acid activates two pathways required for  
726meiosis in mice. *PLoS Genet* *10*, e1004541.
- 727Koubova, J., Menke, D.B., Zhou, Q., Capel, B., Griswold, M.D., and Page, D.C. (2006). Retinoic  
728acid regulates sex-specific timing of meiotic initiation in mice. *Proc Natl Acad Sci U S A* *103*,  
7292474-2479.
- 730Kumar, S., Chatzi, C., Brade, T., Cunningham, T.J., Zhao, X., and Duester, G. (2011). Sex-  
731specific timing of meiotic initiation is regulated by *Cyp26b1* independent of retinoic acid  
732signalling. *Nat Commun* *2*, 151.
- 733La Manno, G., Soldatov, R., Zeisel, A., Braun, E., Hochgerner, H., Petukhov, V., Lidschreiber,  
734K., Kastri, M.E., Lonnerberg, P., Furlan, A., *et al.* (2018). RNA velocity of single cells. *Nature*  
735*560*, 494-498.
- 736La Salle, S., Mertineit, C., Taketo, T., Moens, P.B., Bestor, T.H., and Trasler, J.M. (2004).  
737Windows for sex-specific methylation marked by DNA methyltransferase expression profiles in  
738mouse germ cells. *Dev Biol* *268*, 403-415.
- 739Le Bouffant, R., Souquet, B., Duval, N., Duquenne, C., Herve, R., Frydman, N., Robert, B.,  
740Habert, R., and Livera, G. (2011). *Msx1* and *Msx2* promote meiosis initiation. *Development* *138*,  
7415393-5402.
- 742Lesch, B.J., Dokshin, G.A., Young, R.A., McCarrey, J.R., and Page, D.C. (2013). A set of genes  
743critical to development is epigenetically poised in mouse germ cells from fetal stages through  
744completion of meiosis. *Proc Natl Acad Sci U S A* *110*, 16061-16066.

- 745Maldonado-Saldivia, J., van den Bergen, J., Krouskos, M., Gilchrist, M., Lee, C., Li, R., Sinclair,  
746A.H., Surani, M.A., and Western, P.S. (2007). Dppa2 and Dppa4 are closely linked SAP motif  
747genes restricted to pluripotent cells and the germ line. *Stem Cells* 25, 19-28.
- 748Margueron, R., and Reinberg, D. (2011). The Polycomb complex PRC2 and its mark in life.  
749*Nature* 469, 343-349.
- 750McFarlane, L., Truong, V., Palmer, J.S., and Wilhelm, D. (2013). Novel PCR assay for  
751determining the genetic sex of mice. *Sex Dev* 7, 207-211.
- 752McLaren, A. (1983). Sex reversal in the mouse. *Differentiation* 23 *Suppl*, S93-98.
- 753McLaren, A. (1984). Meiosis and differentiation of mouse germ cells. *Symp Soc Exp Biol* 38, 7-  
75423.
- 755McLaren, A. (2003). Primordial germ cells in the mouse. *Dev Biol* 262, 1-15.
- 756McLaren, A., and Southee, D. (1997). Entry of mouse embryonic germ cells into meiosis. *Dev*  
757*Biol* 187, 107-113.
- 758Menke, D.B., Koubova, J., and Page, D.C. (2003). Sexual differentiation of germ cells in XX  
759mouse gonads occurs in an anterior-to-posterior wave. *Dev Biol* 262, 303-312.
- 760Molyneaux, K.A., Wang, Y., Schaible, K., and Wylie, C. (2004). Transcriptional profiling  
761identifies genes differentially expressed during and after migration in murine primordial germ  
762cells. *Gene Expr Patterns* 4, 167-181.
- 763Naillat, F., Prunskaitė-Hyyryläinen, R., Pietila, I., Sormunen, R., Jokela, T., Shan, J., and Vainio,  
764S.J. (2010). Wnt4/5a signalling coordinates cell adhesion and entry into meiosis during  
765presumptive ovarian follicle development. *Hum Mol Genet* 19, 1539-1550.
- 766Naro, C., Jolly, A., Di Persio, S., Bielli, P., Setterblad, N., Alberdi, A.J., Vicini, E., Geremia, R.,  
767De la Grange, P., and Sette, C. (2017). An Orchestrated Intron Retention Program in Meiosis  
768Controls Timely Usage of Transcripts during Germ Cell Differentiation. *Dev Cell* 41, 82-93 e84.
- 769Nishio, H., Hayashi, Y., Moritoki, Y., Kamisawa, H., Mizuno, K., Kojima, Y., and Kohri, K.  
770(2014). Distinctive changes in histone H3K4 modification mediated via Kdm5a expression in  
771spermatogonial stem cells of cryptorchid testes. *J Urol* 191, 1564-1572.
- 772Oulad-Abdelghani, M., Bouillet, P., Decimo, D., Gansmuller, A., Heyberger, S., Dolle, P.,  
773Bronner, S., Lutz, Y., and Chambon, P. (1996). Characterization of a premeiotic germ cell-  
774specific cytoplasmic protein encoded by *Stra8*, a novel retinoic acid-responsive gene. *J Cell Biol*  
775135, 469-477.
- 776Pesce, M., and Scholer, H.R. (2001). Oct-4: gatekeeper in the beginnings of mammalian  
777development. *Stem Cells* 19, 271-278.
- 778Pimentel, H., Parra, M., Gee, S.L., Mohandas, N., Pachter, L., and Conboy, J.G. (2016). A  
779dynamic intron retention program enriched in RNA processing genes regulates gene expression  
780during terminal erythropoiesis. *Nucleic Acids Res* 44, 838-851.
- 781Rolland, A.D., Jegou, B., and Pineau, C. (2008). Testicular development and spermatogenesis:  
782harvesting the postgenomics bounty. *Adv Exp Med Biol* 636, 16-41.
- 783Rolland, A.D., Lehmann, K.P., Johnson, K.J., Gaido, K.W., and Koopman, P. (2011). Uncovering  
784gene regulatory networks during mouse fetal germ cell development. *Biol Reprod* 84, 790-800.
- 785Small, C.L., Shima, J.E., Uzumcu, M., Skinner, M.K., and Griswold, M.D. (2005). Profiling gene  
786expression during the differentiation and development of the murine embryonic gonad. *Biol*  
787*Reprod* 72, 492-501.
- 788Soh, Y.Q., Junker, J.P., Gill, M.E., Mueller, J.L., van Oudenaarden, A., and Page, D.C. (2015). A  
789Gene Regulatory Program for Meiotic Prophase in the Fetal Ovary. *PLoS Genet* 11, e1005531.
- 790Soumillon, M., Necsulea, A., Weier, M., Brawand, D., Zhang, X., Gu, H., Barthes, P., Kokkinaki,  
791M., Nef, S., Gnirke, A., *et al.* (2013). Cellular source and mechanisms of high transcriptome  
792complexity in the mammalian testis. *Cell Rep* 3, 2179-2190.
- 793Souquet, B., Tourpin, S., Messiaen, S., Moison, D., Habert, R., and Livera, G. (2012). Nodal  
794signaling regulates the entry into meiosis in fetal germ cells. *Endocrinology* 153, 2466-2473.

106

107

795Spiller, C., and Bowles, J. (2019). Sexually dimorphic germ cell identity in mammals. *Curr Top*  
796*Dev Biol* 134, 253-288.

797Spiller, C.M., Bowles, J., and Koopman, P. (2012a). Regulation of germ cell meiosis in the fetal  
798ovary. *Int J Dev Biol* 56, 779-787.

799Spiller, C.M., Feng, C.W., Jackson, A., Gillis, A.J., Rolland, A.D., Looijenga, L.H., Koopman,  
800P., and Bowles, J. (2012b). Endogenous Nodal signaling regulates germ cell potency during  
801mammalian testis development. *Development* 139, 4123-4132.

802Stallings, N.R., Hanley, N.A., Majdic, G., Zhao, L., Bakke, M., and Parker, K.L. (2002).  
803Development of a transgenic green fluorescent protein lineage marker for steroidogenic factor 1.  
804*Mol Endocrinol* 16, 2360-2370.

805Sun, J., Ting, M.C., Ishii, M., and Maxson, R. (2016). Msx1 and Msx2 function together in the  
806regulation of primordial germ cell migration in the mouse. *Dev Biol* 417, 11-24.

807Surani, M.A., Hayashi, K., and Hajkova, P. (2007). Genetic and epigenetic regulators of  
808pluripotency. *Cell* 128, 747-762.

809Suzuki, A., and Saga, Y. (2008). Nanos2 suppresses meiosis and promotes male germ cell  
810differentiation. *Genes Dev* 22, 430-435.

811Tang, W.W., Dietmann, S., Irie, N., Leitch, H.G., Floros, V.I., Bradshaw, C.R., Hackett, J.A.,  
812Chinnery, P.F., and Surani, M.A. (2015). A Unique Gene Regulatory Network Resets the Human  
813Germline Epigenome for Development. *Cell* 161, 1453-1467.

814Telley, L., Agirman, G., Prados, J., Fièvre, S., Oberst, P., Vitali, I., Nguyen, L., Dayer, A., and  
815D., J. (2018). Single-cell transcriptional dynamics and origins of neuronal diversity in the  
816developing mouse neocortex. *BioRxiv*.

817Teo, C.H., Vishwanthan, S.V.N., Smola, A.J., and Le, Q.V. (2010). Bundle Methods for  
818Regularized Risk Minimization. *Journal of Machine Learning Research* 11, 311–336.

819Upadhyay, S., and Zamboni, L. (1982). Ectopic germ cells: natural model for the study of germ  
820cell sexual differentiation. *Proc Natl Acad Sci U S A* 79, 6584-6588.

821Vernet, N., Mark, M., Condrea, D., Féret, B., Klopfenstein, M., Alunni, V., Teletin, M., and  
822Ghyselinck, N.B. (2019). Meiosis Initiates In The Fetal Ovary Of Mice Lacking All Retinoic  
823Acid Receptor Isotypes. *BioRxiv*.

824Western, P., Maldonado-Saldivia, J., van den Bergen, J., Hajkova, P., Saitou, M., Barton, S., and  
825Surani, M.A. (2005). Analysis of Esg1 expression in pluripotent cells and the germline reveals  
826similarities with Oct4 and Sox2 and differences between human pluripotent cell lines. *Stem Cells*  
82723, 1436-1442.

828Western, P.S., Miles, D.C., van den Bergen, J.A., Burton, M., and Sinclair, A.H. (2008). Dynamic  
829regulation of mitotic arrest in fetal male germ cells. *Stem Cells* 26, 339-347.

830Western, P.S., van den Bergen, J.A., Miles, D.C., and Sinclair, A.H. (2010). Male fetal germ cell  
831differentiation involves complex repression of the regulatory network controlling pluripotency.  
832*FASEB J* 24, 3026-3035.

833Wong, J.J., Ritchie, W., Ebner, O.A., Selbach, M., Wong, J.W., Huang, Y., Gao, D., Pinello, N.,  
834Gonzalez, M., Baidya, K., *et al.* (2013). Orchestrated intron retention regulates normal  
835granulocyte differentiation. *Cell* 154, 583-595.

836Yao, H.H., DiNapoli, L., and Capel, B. (2003). Meiotic germ cells antagonize mesonephric cell  
837migration and testis cord formation in mouse gonads. *Development* 130, 5895-5902.

838Yap, K., Lim, Z.Q., Khandelia, P., Friedman, B., and Makeyev, E.V. (2012). Coordinated  
839regulation of neuronal mRNA steady-state levels through developmentally controlled intron  
840retention. *Genes Dev* 26, 1209-1223.

841Zamboni, L., and Upadhyay, S. (1983). Germ cell differentiation in mouse adrenal glands. *J Exp*  
842*Zool* 228, 173-193.

843

844

108

109

110

## 845 **Figure legends**

846 **Figure 1. Generation of the germ cell sex determination atlas.** (A) Schematic  
847 representation of developing testis and ovary highlighting the major events of male and  
848 female germ cell differentiation as well as the time points used in the study. (B)  
849 Illustration of the experimental workflow using the 10x Genomics Chromium platform.  
850 UMAP Projection of 14,750 germ cells colored by time (C), sex (D) and computed  
851 pseudotime going from 0 (E10.5 cells) to 100 (E16.5 cells) (E). (F) Heatmap of 67 well  
852 known genes involved in germ cell differentiation. Cells were ordered using a pseudotime  
853 score generated with ordinal regression modeling, expression was smoothed to reduce  
854 dropout effect and obtain a better visualization of expression tendencies (expression  
855 scale: log normalized counts normalized per gene). Cells with lowest score (E10.5) are in  
856 the center of the figure and those with highest scores (E16.5) are on the left side for XX  
857 cells and on the right side for XY cells. The relevant processes regulated by these genes  
858 (cell cycle, male sex determination, meiosis, pluripotency and others) are indicated on the  
859 left side of the heatmap.

860

861 **Figure 2. Gene regulation network analysis reveals transient patterns of**  
862 **transcription activation during germ cell sex determination.** (A) Activity (see STAR  
863 method) heatmap of the 394 regulons with positive association with their master  
864 regulator. Regulons were clustered in 30 modules (M1-M30) using hierarchical clustering  
865 with Spearman correlation distance. Cells were ordered according to their pseudotime  
866 score with lowest score (E10.5) in the center of the figure and highest score (E16.5) on  
867 the left side for XX cells and on the right side for XY cells. Boxes on the right display  
868 examples of master regulators of interest that are colored by dominant activity in XX

37

111

112

113

869(pink) or XY (blue) cells. In brackets is the number of target genes for each master  
870regulator. (B) Smoothed expression heatmap of well known marker genes involved in  
871germ cells differentiation. Expression scale: log normalized counts normalized per gene.

872

873**Figure 3. Sex-specific, sequential waves of cell cycle genes during germ cells**  
874**differentiation.** Smoothed expression heatmap of cell cycle genes. Cells were ordered  
875according to their pseudotime. Cells with lowest score (E10.5) are in the center of the  
876figure and those with the highest scores (E16.5) are on the left side for XX cells and on  
877the right side for XY cells. Log normalized expression values were normalized per row.

878

879**Figure 4. Gene regulation network of the meiotic genes *Stra8*, *Rec8* and *Ythdc2*.** (A)  
880Gene regulation network of *Rec8*, *Stra8* and *Ythdc2* with connection to their regulators.  
881Color of the edge represent positive (green) or negative (red) regulation. Edge width is  
882proportional to association score of the target gene to the master regulator. Blue and red-  
883fill colors indicate high expression in XY and XX germ cells, respectively (Log2 FC). (B)  
884Expression profiles of selected genes involved in *Rec8*, *Stra8* and *Ythdc2* gene regulation.  
885The solid line represents the smoothed expression curves of the gene in the cells ordered  
886by pseudotime, and the fade band is the 95% confidence interval of the model.

887

888**Figure 5. Relative abundance of nascent (unspliced) and mature (spliced)**  
889**transcripts reveals gene- or sex-specific differences in transcriptomic kinetics.**  
890Expression profile of spliced (solid line) and unspliced (dash line) forms of transcripts in  
891XX (red) and XY (blue) germ cells across pseudotime for (A) meiosis-associated genes,  
892(B) selected regulators of *Stra8*, *Rec8* and *Ythdc2* expression and (C) mitosis-associated

114

115

116

893genes. As unspliced transcripts are less detected, spliced expression levels were  
894multiplied by the gamma factor as in La Manno, 2018. In (B) UMAP projection of  
895*Ythdc2* transcripts in the cells colored by pooled abundance of spliced and unspliced  
896transcripts. Expression scale: log normalized counts.

897

898**Figure 6. Altered identity and delayed meiosis in adrenal XY germ cells.** (A) UMAP  
899projections of 14,718 gonadal cells and 312 ectopic XY germ cells developing in the  
900adrenal colored by organ (left) and time (right). Adrenal germ cells are represented with  
901larger dots. (B) Expression profiles of selected genes involved in meiosis, oogenesis and  
902spermatogenesis differentiation process. The solid line represents the smoothed expression  
903curves of the gene in the cells ordered by pseudotime, and the fade band is the 95%  
904confidence interval of the model.

905

117

Figure 1

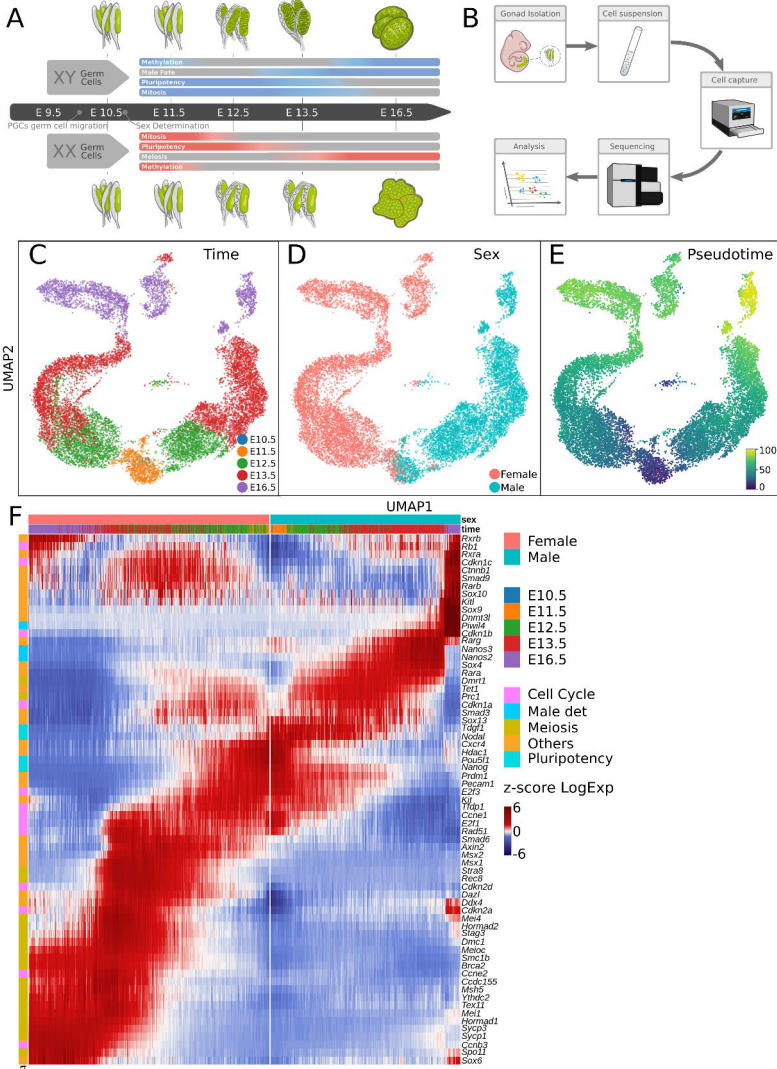



Figure 2

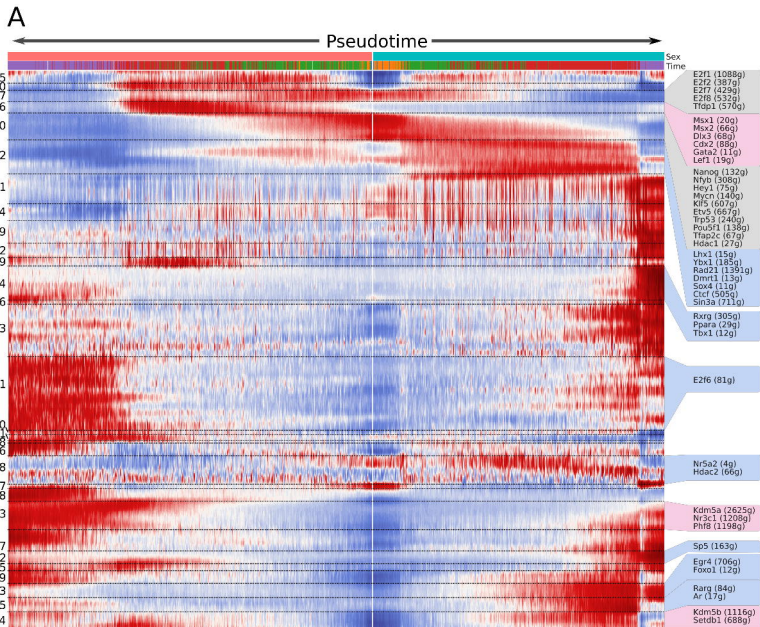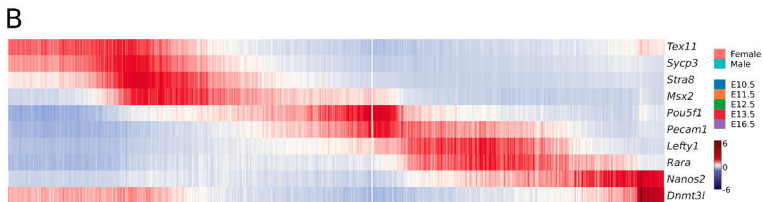

Figure 3

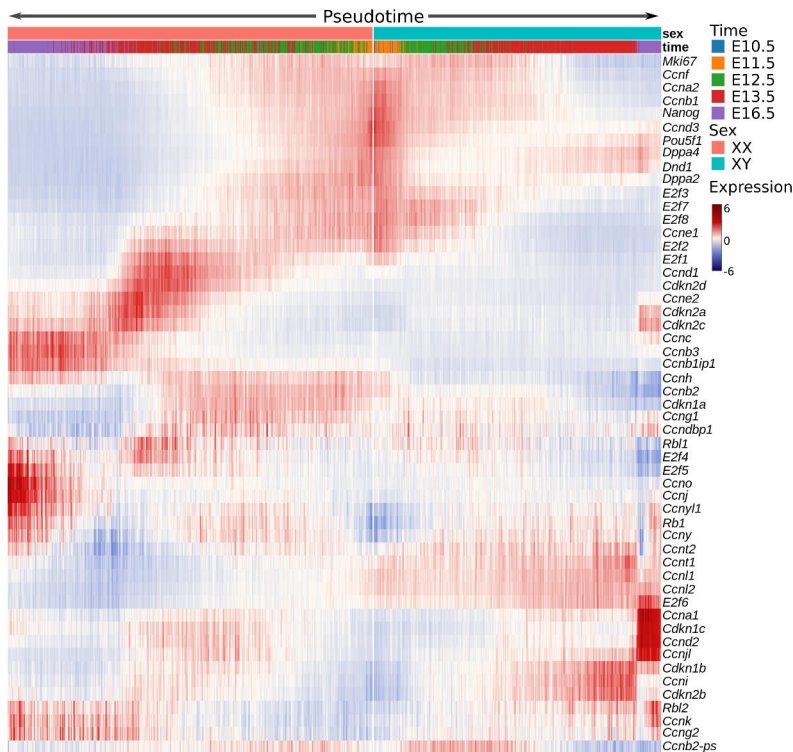

Figure 4

A

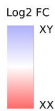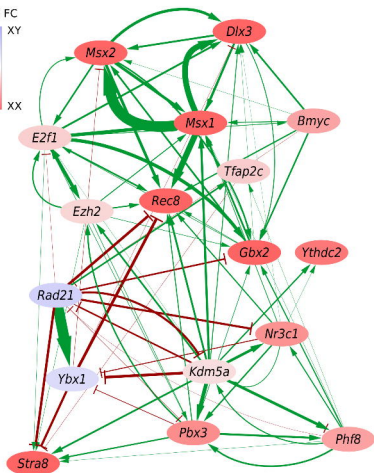

B

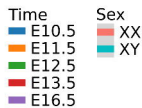

*Ybx1*

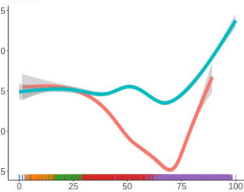

*Rad21*

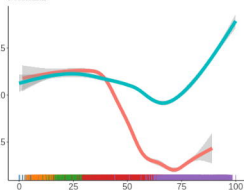

*Msx1*

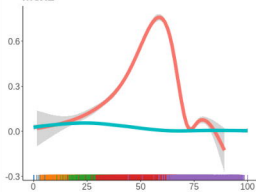

*Rec8*

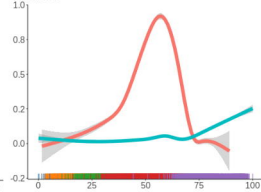

*Kdm5a*

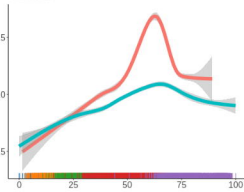

*Msx2*

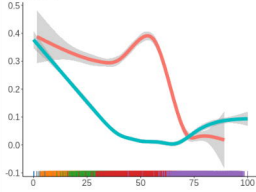

*Stra8*

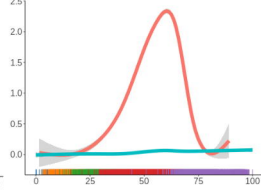

*Pbx3*

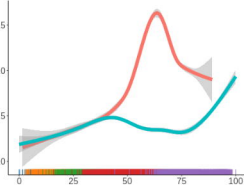

Figure 5

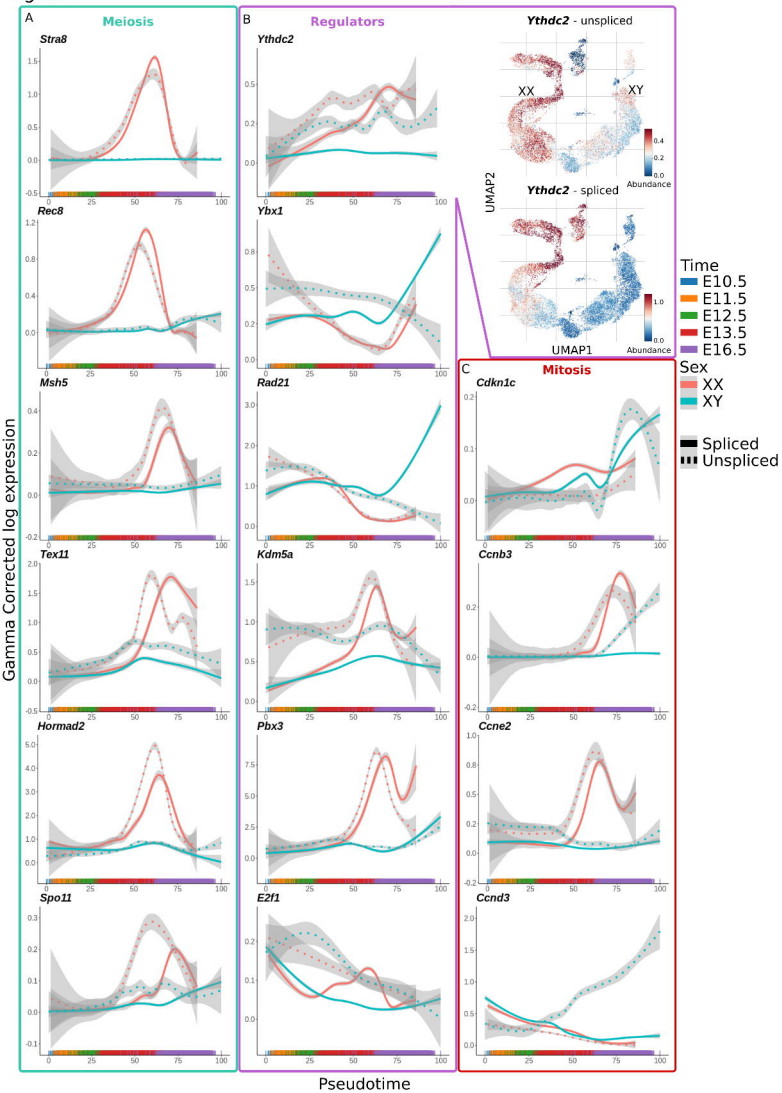

Figure 6

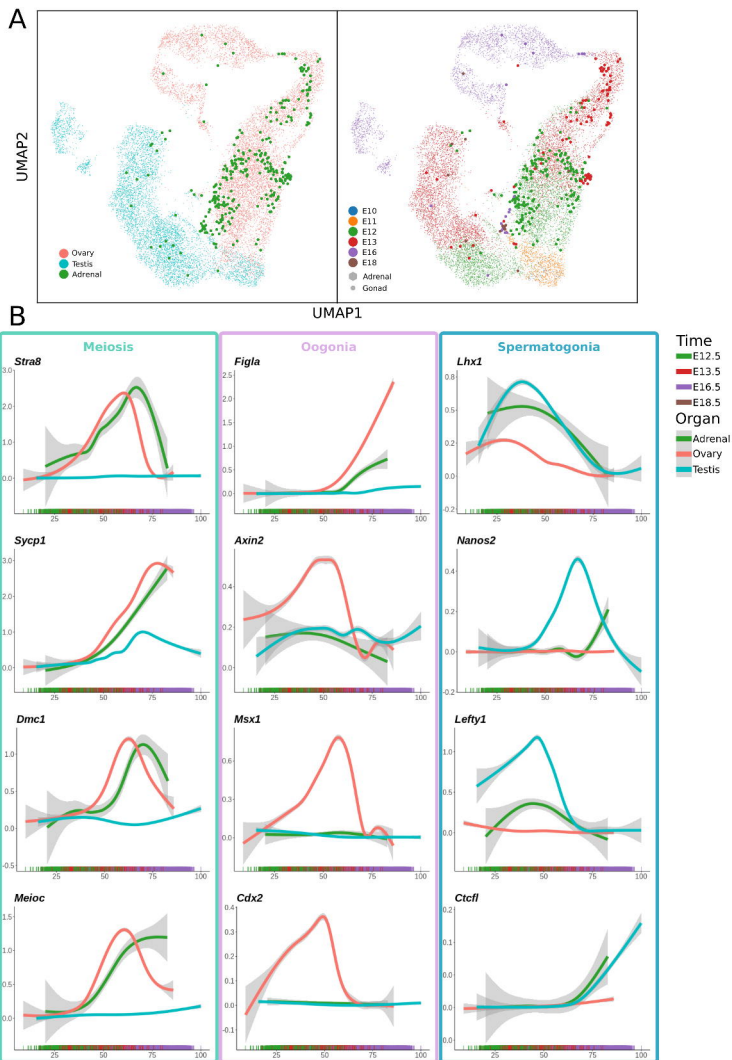

Source: https://www.biorxiv.org/content/10.1101/747279v1.full.pdf
